1 **Analysis of Genomes of Bacterial Isolates from Lameness Outbreaks in Broilers**

2 N. Simon Ekesi,<sup>a\*</sup> Beata Dolka,<sup>ab</sup> Adnan A.K. Alrubaye,<sup>a</sup> Douglas D. Rhoads<sup>a#</sup>

3 <sup>a</sup>Cell and Molecular Biology program, University of Arkansas, Fayetteville, AR, USA

4 <sup>b</sup>Department of Pathology and Veterinary Diagnostics, Institute of Veterinary Medicine,  
5 Warsaw University of Life Sciences – SGGW, Warsaw, Poland.

6

7 Running Head: Broiler Lameness Bacterial Genomes

8

9 #Address correspondence to Douglas D. Rhoads, [drhoads@uark.edu](mailto:drhoads@uark.edu)

10 \*Present address: N. Simon Ekesi, Arkansas Regional Laboratory, Division of Microbiology, Food  
11 and Drug Administration, Jefferson, AR, USA

12

13 **Abstract:**

14 We investigated lameness outbreaks at commercial broiler farms in Arkansas. From Bacterial  
15 Chondronecrosis with Osteomyelitis (BCO) lesions, we obtained different isolates of distinct  
16 bacterial species. Genome assemblies for *Escherichia coli* and *Staphylococcus aureus* isolates show  
17 that BCO-lameness pathogens on farms can differ significantly. Genomes assembled from  
18 *Escherichia coli* isolates from three different farms were quite different from each other, and  
19 more similar to isolates from different hosts and geographical locations. The *S aureus* genomes  
20 were closely related to chicken isolates from Europe, and appear to have been restricted to  
21 chicken hosts for more than 40 years. Detailed analyses of genomes from this clade of chicken  
22 isolates with a sister clade of human isolates, suggests the acquisition of a particular  
23 pathogenicity island in the transition from human to chicken pathogen and that pathogenesis in  
24 chickens may depend on this mobile element. Phylogenomics is consistent with more frequent  
25 host shifts for *E. coli*, while *S. aureus* appears to be highly host restricted. Isolate-specific  
26 genome characterizations will help further our understanding of the disease mechanisms and  
27 spread of BCO-lameness, a significant animal welfare issue.

28 **Importance:**

29 Detailed inspection of the genome sequences of different bacterial species associated with  
30 causing lameness in broiler chickens reveals that one species, *E. coli*, appears to easily switch  
31 hosts from humans to chickens and other host species. Conversely, isolates of *S. aureus* appear  
32 to be restricted to specific hosts. One potential mobile DNA element has been identified that  
33 may be critical for causing disease in chickens for *S. aureus*.

34 **Keywords:** *E. coli*; *S. aureus*; lameness; broiler; genome

35

## 36 Introduction

37 Lameness poses animal health welfare issues which results in significant losses in poultry  
38 production. Modern broilers selectively bred for rapid growth are particularly prone to leg  
39 problems (1). Bacterial chondronecrosis with osteomyelitis (BCO) is the leading cause of  
40 lameness in broiler and broiler breeder flocks (1-3). In birds that develop lameness, bacteria  
41 translocate into the bloodstream via the integument, respiratory system or gastrointestinal  
42 tract (1, 4, 5). Bacteria may have come from the immediate environment, or vertical transfer  
43 through the egg (6). Bacteria that survive in the blood may colonize the proximal growth plate  
44 of the rapidly growing femorae and tibiae, inducing necrosis leading to BCO-lameness (1, 5, 7).  
45 Stressors, or other factors that contribute to immunosuppression, can facilitate bacterial  
46 colonization and BCO spread in commercial poultry flocks (1, 8-13). In our research facility,  
47 *Staphylococcus agnetis* is the primary bacterium isolated from blood and infected bones of  
48 broilers when lameness is induced by growth on raised-wire-flooring (2, 5). Genomic analysis of  
49 *S. agnetis* isolates from chickens and dairy cattle demonstrate that the chicken isolates appear  
50 to be a clade arising from one branch of the cattle isolates (14). Multiple bacterial species have  
51 been historically identified from BCO lesions in different studies (1, 2, 11, 15-22) but there are  
52 few reports on characterization of genetic relatedness within isolates for a particular species  
53 obtained from chicken BCO lesions (20). Genomic analysis of a chicken isolate of *Staphylococcus*  
54 *aureus* suggested a genetic basis for the jump from human to chicken for an outbreak in the  
55 United Kingdom (23). Surveys of 20 broiler flock farms in Australia suggested that avian  
56 pathogenic *E. coli* was the main BCO isolate (24). Genetic analysis by multilocus sequence type  
57 (MLST), pulsed field gel electrophoresis and PCR phylogenetic grouping, of 15 *E. coli* isolates  
58 from 8 flocks in Brazil indicated significant diversity for vertebral osteomyelitis, and arthritis  
59 isolates, even within the same flock (25). The aim of this study was to characterize the genomes  
60 of BCO isolates from three different commercial broiler farms in Arkansas; to understand the  
61 origins of species causing BCO lameness in industry settings. Understanding the origins of the  
62 bacteria should influence strategies to reduce lameness outbreaks.

## 63 Results and Discussion

### 64 *Diagnosis and Microbiological Sampling*

65 In June of 2016 we surveyed two commercial broiler houses on separate farms experiencing  
66 outbreaks of BCO-lameness. Both houses had experienced a loss of cooling a week earlier,  
67 causing heat stress for several hours. The farms were in rural, central Arkansas, separated by  
68 6.3 km, operated by the same integrator, and stocked from the same hatchery. The company  
69 veterinarian reported that samples from lame birds had been routinely submitted to a poultry  
70 health diagnostics laboratory and were primarily diagnosed as *E. coli*. For both farms we  
71 randomly collected lame birds for necropsy for BCO lesions. Blood and lesion swabs were  
72 collected from these birds, and house air was sampled, for bacterial species surveys. We used  
73 chromogenic diagnostic medium to assess whether multiple samples from the same bird  
74 appeared to yield significant numbers of a single colony type (size and color), indicating a single  
75 contributing species.

76 In Farm 1 the birds were 31 days old. We diagnosed and necropsied six lame birds (Table 1).  
77 KB1 and KB2 were symptomatic of spondylolisthesis/kinky-back (KB). KB1 had BCO lesions in T4,  
78 left tibia, and both femora. We obtained thousands (TNTC; too numerous to count) of small  
79 green colonies from the T4 sample that were determined to be *Enterococcus cecorum*. KB2 had  
80 BCO of only the left tibia, but no colonies were recovered from sampling from this site. We did  
81 recover approximately 50 green colonies from what appeared to be a normal T4 that were *E.*  
82 *cecorum*. Lame3 and Lame4 both had bilateral BCO of the femora and tibiae. Lame3 had TNTC  
83 white colonies from microbiological sampling of T4 that were *S. agnetis*. Lame5 had bilateral  
84 FHN, bilateral tibial dyschondroplasia (TD), and pericarditis. We recovered green colonies (20  
85 from left and TNTC from right) from the TD lesions that were *E. cecorum*. Due to limited  
86 supplies there was no microbiological sampling for Lame4 and Lame6.

87 For Farm 2 the birds were 41 days of age. We diagnosed and necropsied seven lame birds  
88 (Table 1). Lame7 was diagnosed with BCO lesions of the left femur, and right tibia. We obtained  
89 30 purple colonies that were *E. coli* from the blood sample. We diagnosed Lame8 with bilateral  
90 BCO of tibia and femur. No colonies were obtained from sampling this bird. Lame9 was  
91 diagnosed with BCO of bilateral tibia, and the left femur, with evident pericarditis.  
92 Approximately 100 purple colonies were produced from sampling of the left femur that were  
93 determined to be *E. coli*. Lame10 was diagnosed with BCO of both tibia and right femur.

94   Lame10 also had pericarditis. We got 40 white colonies from the left tibia, and 70 white  
95   colonies from the right femur that were *Salmonella enterica*. Lame11 had BCO lesions on both  
96   tibiae and femora. We got TNTC purple colonies from the left tibia, three from the left femur,  
97   and 15 from blood that were determined to be *E. coli*. Lame12 was diagnosed with bilateral  
98   BCO of tibia and femur. We recovered approximately 500 purple colonies from blood, 40 purple  
99   colonies from the left tibia, and TNTC purple colonies from the left femur that were *E. coli*. Due  
100  to limited supplies there was no microbiological sampling for Lame13.

101  Average plate counts for air sampling were 80 and 125 for Farm 1 and Farm 2, respectively. The  
102  predominant species was *Staphylococcus cohnii* (~95%) with 3-4% *Staphylococcus lentus* and 1-  
103  2% *E. coli*. Air sampling during our broiler experiments at the University of Arkansas Poultry  
104  Research farm typically identify predominantly *S. cohnii* but not *E. coli* (26, 27).

105  In July 2019, we sampled a third commercial broiler farm (Farm 3) in Northwest Arkansas, more  
106  than 88 km from Farms 1 & 2 and operated by a different integrator supplied from a different  
107  hatchery. We sampled 11 lame birds at 35 days of age (Table 1). Lame14, was diagnosed with  
108  BCO of bilateral tibiae and right femur. We recovered numerous white colonies from the left  
109  femur, right tibia, and left tibia that were determined to be *Staphylococcus aureus*. Lame15 had  
110  BCO of all femorae and tibiae. Culture plates had numerous white colonies from all four  
111  sampled sites that were *S. aureus*. Lame16 had BCO of all tibiae and femorae. We recovered 10  
112  green colonies from the right femur that were not analyzed, and 10 white colonies from the left  
113  tibia that were determined to be *S. aureus*. We diagnosed Lame17 with BCO of the right femur  
114  and both tibiae. We recovered numerous white colonies from all three sites that were *S.*  
115  *aureus*. Lame18 was diagnosed with bilateral BCO of the femorae and the tibiae. We got TNTC  
116  purple colonies from both femorae, and a few purple colonies from both tibiae, that were *E.*  
117  *coli*. Lame19 had BCO of all femorae and tibiae. Swabs gave only a few colonies of *S.*  
118  *epidermidis* that we assumed were contaminants during sampling. Lame20 had bilateral BCO of  
119  the tibiae. We recovered a few green colonies of *Staphylococcus cohnii* which were presumed  
120  contaminants during sampling. Lame21 had BCO of all femorae and tibiae. We isolated TNTC  
121  white colonies from all four sites that were *S. aureus*. Lame22 was diagnosed with bilateral BCO  
122  of femorae and tibiae. Microbial sampling only yielded only 10 green colonies from the right

123 femur that were determined to be *Staphylococcus simulans*. Lam23 was diagnosed with  
124 bilateral BCO of femorae and tibiae. Culture plates had only white colonies, TNTC from both  
125 femora and tibiae, that were *S. aureus*. Lam24 had BCO of all femorae and tibiae. We  
126 recovered more than 100 white colonies from each of the four BCO lesions that were *S. aureus*.

### 127 *BCO Genome Assemblies*

128 We chose to characterize genomes for four representative *E. coli* isolates: 1409 for Farm 1,  
129 1413 from Farm 2, and 1512 and 1527 from one bird on Farm 3 (Table 2). A hybrid assembly for  
130 1409 produced 5.05 Mbp in 23 contigs that organized into 4 DNA assembly graphs. We resolved  
131 the replicons using the long reads for contiguity analysis of the assembly graphs using the  
132 Bandage software. The resolved genome contains a 4.84 Mbp chromosome, with episomes of  
133 113.6, 108.7, and 2.3. The predicted serotype was O16. The hybrid assembly for 1413 produced  
134 5.37 Mbp in 59 contigs and 3 DNA assembly graphs. Unfortunately, the MinION reads were not  
135 of sufficient quality or length to complete a contiguity analysis of the entire genome, but did  
136 identify at least two episomes of 98.8 kbp and 2257 bp. The predicted serotype was O78. Draft  
137 assemblies were generated for *E. coli* 1512 and 1527. The assembly of 1512 contained 4.96  
138 Mbp in 152 contigs with a N50 of 150 kbp. The assembly of 1527 was 4.90 Mbp in 179 contigs.  
139 The N50 was 97 Kbp with the largest contig of 258 Kbp. Both 1512 and 1527 were predicted to  
140 be serotype O78, like 1413. We generated draft assemblies for 14 *S. aureus* isolates from Farm  
141 3 to examine genome diversity within a farm and within individual birds (Table 2). Two colonies  
142 from separate sample sites from seven lame birds were used for draft genome assembly (1510  
143 & 1511, 1513 & 1514, 1515 & 1516, 1517 & 1518, 1519 & 1520, 1521 & 1522, 1523 & 1524).  
144 The assemblies (Table 2) ranged from 2.79 to 2.82 Mbp in 60 to 96 contigs (excluding contigs <  
145 300 bp). The largest contigs were between 279 and 284 Kbp. N50 values ranged from 58 to 113  
146 kbp. The L50 values ranged from 7 to 14 contigs. Each of the *S. aureus* assemblies had at least 3  
147 circular contigs (episomes).

### 148 *Phylogenetic Comparison*

149 To examine the phylogenetic relationships between *E. coli* isolates from the three farms, we  
150 identified the most closely related genomes, according to PATRIC, for 1409 (Farm 1), 1413  
151 (Farm 2), 1512, and 1527 (Farm 3). We used the closest related genomes as surrogates, MOD1-

152 EC6458 for 1409, PSUO78 for 1413, and ECO0667 for 1512/1527, to determine the placement  
153 of these isolates within the NCBI dendrogram for more than 18,000 *E. coli* genomes  
154 (<https://www.ncbi.nlm.nih.gov/genome/167>). This placed our isolates from the three farms in  
155 very distinct clades in the dendrogram for all *E.coli* genomes (data not shown). We downloaded  
156 47 genomes representing the most closely related genomes identified by PATRIC for our four  
157 BCO *E. coli* genomes. We generated a phylogenetic tree for all 51 genomes using Average  
158 Nucleotide Identity (ANI), where genomes are identified by region and host/source (Figure 1  
159 and Table S1). Isolate 1409 grouped with one chicken isolate from Pakistan and 4 isolates from  
160 chickens in China. The other closely related isolates in that same branch were from mammalian  
161 hosts from the USA, China, France or Mexico. ANI for this cluster is > 99.75%. Isolate 1413  
162 clustered with 12 isolates from chickens, one from turkey meat, from the USA, United Kingdom,  
163 and Denmark, and three human isolates from Bolivia, Latvia and Mexico (ANI > 99.66%). Less-  
164 related genomes are from isolates from humans. Genomes from isolates 1512 and 1527 are  
165 virtually identical, with an ANI > 99.995%, which is not surprising since they were isolated from  
166 different anatomical sites in the same lame bird. Genomes for 1512 and 1527 clustered with  
167 those from chicken isolates from Poland, United Kingdom, and USA, along with genomes from  
168 isolates from humans in Japan, France and Estonia, pig isolates from China and USA, and a  
169 water sample from Arizona (ANI > 99.83%). Less-related genomes were from a colisepticemic  
170 turkey in Israel, Swiss chicken meat, a USA human isolate and deer feces from Pennsylvania.  
171 Therefore, while the clade for isolate 1413 seems to have a significant affinity for infecting  
172 poultry there are some human isolates. The clade for 1409 and the clade 1512/1527 both show  
173 a diversity of hosts including poultry and mammals. All three clades show a wide geographic  
174 distribution.

175 The PATRIC closest-genome report for our new *S. aureus* chicken assemblies listed 11 *S. aureus*  
176 genomes for isolates obtained from chickens. Ten of these isolates cluster exclusively on one  
177 branch of a subtree in the NCBI genome dendrogram, and this cluster is next to a sister cluster  
178 of 13 human isolates (Figure 2). The close relationship of most of these chicken isolates had  
179 been previously demonstrated by Lowder *et al.* (23) using MLST to characterize *S. aureus*  
180 isolates from avian hosts. Those previous analyses suggested a specific host switch from  
181 humans to poultry and a close relationship among *S. aureus* isolated from the global chicken

182 industry from 1970 to 2000. The genome of isolate ED98 was assembled as the type strain  
183 representing a BCO isolate from *S. aureus* from 1986 or 1987 in Ireland (23). We generated an  
184 ANI-based phylogenomic tree (Figure 3) for our 14 new *S. aureus* chicken BCO isolate genomes,  
185 the 11 chicken isolates from the ED98 clade, and included the two most closely related human  
186 isolates (based on PATRIC) from the sister clade in Figure 2. Our 14 BCO *S. aureus* genomes  
187 grouped together with an ANI > 99.998%, indicating a clonally-derived population. The 14 BCO  
188 *S. aureus* clustered with genomes for four isolates (B4-59C, B3-17D, B2-15A, B8-13D) from retail  
189 chicken meat from Tulsa, Oklahoma, in 2010 and a deep-wound lesion from a broiler from  
190 Poland in 2008 (ch23). Further distant are two additional Poland 2008 isolates (ch21 and ch22)  
191 from chicken wounds and lesions, and ED98 from the Ireland 1980s chicken BCO outbreak. Even  
192 further distant are ch9 from an infected chicken hock in 1999 in the USA, along with ch3 and  
193 ch5 which are recorded as chicken commensals from Belgium in 1976. The closest human  
194 isolates are CFBR-171 from a sputum sample from the USA in 2012 and GHA2 from a 2018  
195 patient in Ghana. Additional details on these isolates are provided in Table S1. Our ANI based  
196 phylogenomics are in agreement with the work of Louder *et al.* (23), where they used MLST and  
197 mutational analysis of bi-allelic polymorphisms to demonstrate the tight relationship of 19  
198 isolates of *S. aureus* from poultry in the USA, Japan, Denmark, Belgium, and United Kingdom.  
199 They had concluded that the “jump” to chickens likely was associated with the chicken  
200 commensals, ch3 and ch5, from Belgium. The 19 poultry isolates were derived from the human  
201 ST5 clade based and likely derived from human isolates circulating in Poland. The ED98 genome  
202 was assembled as representative of the chicken pathogens in 1986 or 1987. Limited genome  
203 comparisons prompted Louder *et al.* (23) to conclude that the host switch by ED98 was  
204 associated with “acquisition of novel mobile genetic elements from an avian-specific accessory  
205 gene pool, and by the inactivation of several proteins important for human disease  
206 pathogenesis.” This was evidenced by their demonstration of enhanced resistance to killing by  
207 chicken heterophils.

208 In order to revisit the specific genomic changes in the clade of *S. aureus* isolates from chickens  
209 we used the RAST SEED Viewer proteome comparison tool to determine whether we could  
210 more precisely identify the genes distinguishing the human pathogens (GHA2 and CFBR-171), to  
211 either chicken commensal (ch3 and ch5), or chicken pathogens (ED98, B4-59C, and ch21). We



212 used the ED98 predicted proteins as the reference, to identify polypeptides conserved over the  
213 entire polypeptide length at >80% identity in chicken pathogens, where the chicken  
214 commensals and human pathogens, encode a polypeptide of <80% identity. This filtering  
215 identified 33 protein encoding genes (PEG) from the main chromosome and none from the  
216 three plasmids in ED98 (Table 3 marked with \*). Two clusters were identified associated with  
217 two mobile elements: a transposon and a *S. aureus* pathogenicity island (SaPI). There was also  
218 an additional short PEG (PEG 48). To further define any association of these 33 PEGs with the  
219 jump from humans to chickens we used tBLASTn to individually query the genomes of 11 *S.*  
220 *aureus* chicken isolates: 2 chicken commensals and 9 pathogens. We also performed a tBLASTn  
221 of 29 human *S. aureus* isolates including 10 from the sister clade in Figure 2 and an additional  
222 19 representing clades flanking these two clades based on the NCBI genome tree. The tBLASTn  
223 included all 33 PEGs as well as immediate flanking or intervening PEGs (Table 3). The results  
224 show that PEG 48 is a hypothetical 56 residue polypeptide that appears only in the chicken  
225 pathogens. The transposon-related region (PEG 1641-1659) contained no PEG that was highly  
226 conserved in all the chicken pathogens while also less conserved in all the human isolates and  
227 the chicken commensals. Therefore PEG 48 or PEG 6141-1659 are not likely to be relevant to  
228 the jump from human to chicken pathogen. On the other hand, the SaPI region (PEG 755-773)  
229 contained a number of PEGs that appear highly conserved in all the chicken pathogens. Some  
230 of these PEGs (i.e., PEG 756-760, 767-771) are also highly conserved in some of the human  
231 pathogens, but lacking in the chicken commensals. The 4 hypothetical PEGs (774-778)  
232 downstream of the SaPI terminase all appear to be specific to the chicken pathogens. Close  
233 inspection of the results in Table 3 suggest that isolate ch9 appears to be intermediate between  
234 the chicken commensals, ch3 and ch5, and all of the chicken pathogens in the ED98 clade. This  
235 is concordant with our ANI phylogenomic analysis (Figure 3) where ch9 is basal relative to the  
236 other chicken pathogens. Thus, ch9 could derive from the earlier transitional state between the  
237 human pathogens to the chicken pathogens. We would anticipate that the genome evolved  
238 further from that earlier form as it adapted for colonization and pathogenesis in chickens. The  
239 data is consistent with the *S. aureus* genome evolving in two directions during the host switch  
240 from human to chickens: loss of the SaPI was associated with transition to a chicken  
241 commensal, and acquisition of new PEGs (perhaps 774-778) in the SaPI to become chicken-

242 specialists. Louder *et al.* (23) had originally identified this SaPI region as associated with the  
243 jump to chickens but in their work they surveyed other avian isolates only by PCR amplification  
244 rather than our survey at the resolution of individual PEGs.

245 SaPI are mobile elements that are packaged by “helper” virus assembly systems and integrate  
246 at a specific location (28, 29). The size of the SaPI element is determined by the packaging limits  
247 of the helper virus and SaPI accessory proteins. The SaPI in question is integrated between  
248 genes for a Methionine ABC transporter (PEG 754) and a CsbD stress response protein (PEG  
249 779). We used tBLASTn of the *S. aureus* accessions in NCBI to survey for the number of entries  
250 with an integrase (PEG 755) homolog directly downstream of the Met ABC transporter  
251 homolog; with homolog threshold set at  $\geq 80\%$  identity for query polypeptide length. Out of  
252 1012 genomes containing PEG 754 homologs (Table 3) there were 307 genomes with a PEG 755  
253 homolog directly downstream; indicating a SaPI integration. Conversely, there were 568  
254 genomes where a PEG 779 homolog directly followed PEG 754, consistent with no SaPI inserted  
255 in those genomes. Our tBLASTn searches also support that the SaPI mobile element extends  
256 from the integrase (PEG 755) through PEG 778, as we never found homologs of PEGs 777, 778,  
257 780 or 781 directly downstream of PEG 754 (data not shown). Queries by tBLASTn using the  
258 PEG sequences from 754 to 779 demonstrate a high variability across the SaPI for whether the  
259 coding sequence is conserved in the genomes of other *S. aureus* isolates (see Count for NCBI *S.*  
260 *aureus* Desc column in Table 3). PEG 755, 759, 760, 764-773 appear to be present in many  
261 (Count range: 199-839) genomes, consistent with many having defined functions for SaPI  
262 mobilization and therefore conserved in many SaPI elements. The 11 coding sequences for PEG  
263 756-758, 761-763, and 774-778 are found in far fewer genomes (Count range: 10-89). We  
264 therefore used tBLASTn to identify those *S. aureus* accessions in NCBI with homologs to these  
265 11 less-conserved PEGs. Only 8 accessions (ED98, ch21, ch22, B2-15A, B8-13D, B4-59C, B3-17D  
266 and X22) contained significant homologs ( $>80\%$  identity over the entire query length) to all 11  
267 coding sequences (Table 3). All are chicken pathogens from the same clade as ED98 with the  
268 exception of X22, which is a genome deposited by the China Animal Disease Control Center, but  
269 the host is not specified. Notably, the chicken commensals ch3 and ch5, have no SaPI  
270 downstream of the MetABC transporter (PEG 754). Therefore, this SaPI does not specify  
271 chicken colonization, but does correlate with pathogenicity in chickens. Clearly, more work

272 needs to be focused on the actual functions of many of the genes in this SaPI and whether the  
273 chicken pathogenicity results from the combination of PEG 48 and the SaPI. Some of the PEGs  
274 in this SaPI have homologs in SaPIs in human isolates, however, the actual functions of the  
275 predicted polypeptides are not well understood (Table 3). One of the hypothetical PEGs, PEG  
276 777, in this SaPI appears to be restricted to only chicken pathogens

277 We next explored whether there were signatures of selection in the evolution of the chicken  
278 pathogen genome progressing from ED98 to the present. We used the RAST SEED Viewer  
279 proteome comparison tool to analyze the evolution of this *S. aureus* chicken clade since 1987  
280 (Table S2). We selected our assembly for 1519 as it was the largest assembly with the fewest  
281 contigs to represent the 2019 isolates from Farm 3. ED98 represents a 1986-1987 isolate in  
282 Ireland, ch21 is from Poland in 2008, and B4-59C is from 2010 in Tulsa, Oklahoma retail poultry  
283 meat. The SEED Viewer filter was set with the ED98 proteome as reference, to identify  
284 predicted proteins absent (<50% identity for query length) in one or more of the other three  
285 proteomes (Table S2). The analysis suggests that 32 proteins (31 phage and hypothetical  
286 proteins, and a efflux pump for Tetracycline resistance) were lost between 1987 and 2008.  
287 Eight phage and hypothetical proteins in ED98 and Ch21, were lost from the genome before  
288 appearance in Tulsa in 2010, and only 4 hypothetical proteins in ED98, ch21 and B4-59C, are  
289 absent in isolate 1519 in Northwest Arkansas in 2019. We then reversed the analysis with 1519  
290 as the reference to identify new proteins that appeared in the lineage from ED98, through Ch21  
291 to B4-59C to 1519. The analysis identified 35 polypeptide genes present in 1519 for which the  
292 other 3 genomes lack a polypeptide with 50% or greater overall identity. Twenty-eight are  
293 phage, hypothetical or plasmid-maintenance related. The remaining seven include a DUF1541  
294 domain-containing polypeptide (PEG 32), a lead/cadmium/zinc/mercury/copper transporting  
295 ATPase (PEG 33), a partial coding sequence for phosphoglycerate kinase (PEG 421), and an  
296 aminoglycoside N6'-acetyltransferase (PEG 1919). Two open reading frames (PEG 1916 and  
297 1917) are not only new to the 1519 genome but have partially overlapping open reading  
298 frames. Thus, they may represent a frame shifted assembly error. However, reexamination of  
299 the templated alignment of the Illumina HiSeq reads with this particular 4512 bp contig showed  
300 deep coverage and no evidence for an assembly error. PEG 1916 annotates as a 51 residue  
301 SdrC, adhesin of unknown specificity. But BLASTp at NCBI annotates this as a partial (51 of 111

302 residues) sequence for an LPXTG cell wall anchor protein. PEG 1915 annotates as an 1125  
303 residue, full length MSCRAMM SdrD homolog adhesin of unknown specificity. RAST annotates  
304 the 205 PEG 1917 as a methyltransferase subunit for a Type I restriction system, but BLASTp  
305 searches at NCBI suggest an alternative as either an LPXT- cell wall anchor domain, and/or  
306 fibrinogen-binding protein. The assembly predicted this 4512 bp contig containing PEG 1915,  
307 1916 and 1917 to be circular, so this may be a plasmid that encodes one or more adhesin  
308 functions. BLASTp with PEG 32, identified DUF1541 domain polypeptides of similar size in a  
309 wide range of different bacterial species. PEG33, the divalent cation transporter, is also found in  
310 many different *Staphylococcus* species. The aminoglycoside-N6'-acetyltransferase (gene 1919)  
311 has no significant BLASTp homologs in any *S. aureus* genome in NCBI, and the best homologs  
312 are 70% identical in isolates of *Staphylococcus sciuri*, *Staphylococcus lentus*, and *Staphylococcus*  
313 *fleurettii*. This gene is present in a 4357 bp contig that Unicycler could not circularize during  
314 assembly. However, the contig termini each contain portions of a plasmid recombination MobE  
315 mobilization protein that likely could be fused into one open reading frame using long read  
316 sequence data. The other genes in this contig are two hypothetical proteins, a tetracycline  
317 resistance predicted region, and an ArsR-family transcriptional regulator. However, this contig  
318 appears to possibly contain a mobile element affecting antibiotic resistance with the  
319 aminoglycoside transferase and the tetracycline resistance marker. Therefore, *S. aureus* 1519  
320 appears to have obtained additional adhesins and possible antibiotic resistance markers since  
321 divergence from the *S. aureus* found in retail chicken meat in Oklahoma in 2010. Some of these  
322 appear to be associated with mobile elements.

323 Further evolution of this genome is evidenced by proteins highly conserved (>80%) in 1519 and  
324 B4-59C, but not (<50%) in ED98 and ch21. The Tulsa 2010 and Arkansas 2019 isolate genomes  
325 contain 16 proteins not found in ED98 and ch21; including a toxic shock syndrome toxin 1 (PEG  
326 327), and a phage associated exotoxin superantigen (gene 329). Interestingly this region  
327 appears to be a probable SaPI. Inspection of neighboring genes identifies an integrase (PEG  
328 335), terminase (PEG 326) and SaPI associated homologs (PEGs 325 and 330). PEG 327 and 329  
329 are in a 97,219 bp contig predicted as circular that also encodes a number of genes for  
330 exotoxins and SaPI functions. The contig only contains two phage predicted proteins, so it may  
331 be a large plasmid containing many virulence determinants. Additional PEGs found in B4-59C

332 and 1519 genomes but not ED98 and ch21 include a cluster (PEG 2179, 2180, and 2181) of  
333 homologs to hypothetical proteins found in SaPIs. However these PEGs are on a 3446 bp contig.  
334 Inspection of the SEED annotation of the B4-59C assembly identify flanking integrase and  
335 terminase homologs and other SaPI associated homologs. So, this region also may be a  
336 functional, mobile SaPI.

337 There were only 3 proteins identified in 1519, B4-59C and Ch21, but not in ED98; two are  
338 hypothetical (PEG 1197 and 1421) and the other a secretory antigen SsaA-like protein (PEG 49).  
339 This secretory antigen has been associated with transposons and also annotates as a CHAP  
340 domain protein, or putative cell wall lysis protein.

341 Our data demonstrate that this clade of *S. aureus* appears to be restricted to chickens for more  
342 than 40 years, and that it appears to have been in the Oklahoma/Arkansas region for more than  
343 a decade. Our genome comparisons of our recent isolates with the ED98 genome from 1986  
344 shows that the genome has picked up additional virulence determinants (i.e., toxins), which  
345 appear to be associated with mobile SaPI. We do not know how this pathogen is transmitted to  
346 different farms or flocks. It could be vertically transmitted from hen to chicks. Alternatively,  
347 chicks could be exposed at the hatchery, or workers could spread the bacterium to farms  
348 through breakdowns in biosecurity.

349 In contrast the four *E. coli* genomes we characterized from three different farms show a  
350 different pattern. Isolates 1512 and 1527 are highly related as they came from different BCO  
351 lesions in the same lame bird. We have previously reported that, for individual lame birds, we  
352 recover the same species from multiple BCO lesions, and sometimes from the blood (2, 5). Our  
353 analyses of bacteria from BCO lesions in three farms is consistent with a predominant BCO  
354 pathogen within each farm, but multiple species may be contributing to BCO lameness within  
355 each facility. *E. coli* 1409, 1413, and 1512/1527 genomes are very distinct and come from very  
356 different clades. Reports from Brazil using virulence genes or MLST reported distinct *E. coli*  
357 genotypes within a flock (25). However, their data could not place the *E. coli* relative to those  
358 from non-chicken sources. The data for *E. coli* and BCO in chickens is different from the  
359 patterns for *S. aureus* where a single clade has been associated with chickens in Europe and the  
360 USA. In that respect we have similarly reported on a single clade of *S. agnetis* infecting chickens

361 in the USA and Europe (14). The pattern we report from *E. coli* phylogenomics is most  
362 consistent with a generalist pathogen that easily jumps to different host species. Remarkably,  
363 two neighboring farms (Farm1 and Farm2) supplied by the same hatchery and operated by the  
364 same integrator, had very different *E. coli* (1409 and 1413) involved in BCO lameness outbreaks.  
365 This is more consistent with the *E. coli* on each farm originating from other hosts (zoonoses) or  
366 each farm could have “evolved” an *E. coli* BCO pathogen over many flocks and years.

## 367 **Conclusions**

368 Overall, the *E. coli* isolates from BCO lesions in Arkansas appear to be highly diverse, as they  
369 derive from different clades that contain *E. coli* closely related to isolates from non-chicken  
370 hosts. Conversely, the *S. aureus* isolates appear to come from a clade of chicken-specific  
371 isolates associated exclusively with chicken hosts for at least four to five decades. Thus, the  
372 phylogenomics suggest that *E. coli* infecting chickens appears to be a generalist as highly  
373 related isolates are obtained from other hosts. *S. aureus*, which appears to be more of a  
374 specialist restricted to a single host. This distinction may derive from a difference in genome  
375 size as the *E. coli* genomes are roughly twice the size of the *S. aureus* genomes. The larger  
376 genome size would allow *E. coli* to retain a greater diversity of host-specificity virulence genes.  
377 Chicken pathogenicity of *S. aureus* appears to depend, in part, on a specific, mobile  
378 pathogenicity island in which the function of several genes are not defined. There is genomic  
379 evidence that the chicken pathogen clade continues to evolve, possibly driven by integration of  
380 additional different pathogenicity islands.

381

## 382 **Materials and Methods**

### 383 **Microbiological Sampling and Bacterial Species Identification**

384 Diagnosis of and sampling of BCO lesions and blood have been described (1, 2, 7, 30). Initial  
385 characterization of bacterial diversity by number of colonies of a particular color, was on  
386 CHROMagar Orientation (CO; DRG International, Springfield, NJ), and further refined by  
387 restreaking on CHROMagar Staphylococcus (CS; DRG International) (2, 5). Representative  
388 colonies were then diagnosed to species by 16S rRNA gene sequencing (2, 5).

389 Air sampling was by waving open CO plates within the building. CO and then further evaluated  
390 on CS plates. Representative colonies were typed to species as above.

#### 391 *Genomic DNA Isolation and Sequencing*

392 Cultures were preserved in 40% glycerol at -80°C. Working stocks were maintained on tryptic  
393 soy agar slants at 4°C. For DNA extraction, staphylococci were grown in tryptic soy broth to log  
394 phase and DNA was isolated using as described (14). DNA isolation from *E. coli* used lysozyme  
395 treatment, followed by organic extractions (31). DNA was quantified using a GloMax® Multi Jr  
396 Detection System (Promega Biosystems Sunnyvale Inc., CA, USA) and purity evaluated with a  
397 Nanovue spectrophotometer (Healthcare Biosciences AB Uppsala, Sweden). DNA size was  
398 verified by agarose gel (1.5%) electrophoresis.

399 Library construction and Illumina MiSeq 2 x 250 sequencing were at the Michigan State  
400 University Genomics Core Facility. Libraries for Illumina HiSeqX 2 x 125 sequencing were  
401 prepared using a RipTide kit (iGenomX, Carlsbad, CA) and sequenced by Admera Health (South  
402 Plainfield, NJ). Long reads were generated using Oxford Nanopore-MinION bar-code kit, as  
403 described (14).

#### 404 *Genome Assembly and Analysis*

405 *De novo* genome assemblies from short reads were generated as described (14). For hybrid  
406 assemblies the long reads were phase corrected using the Illumina short reads and Ratatosk  
407 v0.3 (<https://github.com/DecodeGenetics/Ratatosk>), before hybrid assembly with Unicycler  
408 v0.4.8 (32). Unicycler hybrid assembly graphs were further analyzed for contiguity in Bandage  
409 0.8.1 (33) to discern and export replicons. The PATRIC (Pathosystems Resource Integration  
410 Center) webserver (34) was used for Unicycler assemblies, assembly annotation, and  
411 identification of similar genomes. Chromosome-level genomes were obtained from NCBI using  
412 genome\_updater ([https://github.com/pirovc/genome\\_updater](https://github.com/pirovc/genome_updater)). Average Nucleotide Identity  
413 (ANI) values were determined using pyANI 0.2.9 (35). ANI values were subtracted from 1 to  
414 generate distance matrices which were submitted to FastME 2.0 (36) using the BioNJ method to  
415 generate Newick trees. Archaeoptryx 0.9928 beta (37) was used to transform Newick trees into  
416 mid-point rooted graphic representations. Assemblies were annotated and compared using the

417 Rapid Annotation using Subsystem Technologies (RAST) and SEED viewer (38, 39). Serotype  
418 prediction was using the ECTyper module at GalaxyTrakr.org. Local BLASTn and tBLASTn  
419 searches used BLAST 2.10.1+ (40).

## 420 **Acknowledgements**

421 Support has been provided in part by grants from Cobb-Vantress, Inc., Zinpro LLC, and the  
422 Arkansas Biosciences Institute, the major research component of the Arkansas Tobacco  
423 Settlement Proceeds Act of 2000. BD was supported by KNOW (Leading National Research  
424 Centre), Scientific Consortium “Healthy Animal – Safe Food”, under of Ministry of Science and  
425 Higher Education No. 05-1/KNOW2/2015, and Department of Pathology and Veterinary  
426 Diagnostics, Institute of Veterinary Medicine, Warsaw University of Life Sciences–SGGW,  
427 Poland. The funders had no role in the design of this study, the interpretation of the results, or  
428 the contents of the manuscript. Thank you to Dr. Mark Hart and Dr. Karen Christensen for  
429 thoughtful comments regarding this manuscript.

## 430 **References**

- 431 1. Wideman RF. 2016. Bacterial chondronecrosis with osteomyelitis and lameness in broilers: a  
432 review. *Poult Sci* 95 325-344.
- 433 2. Al-Rubaye AAK, Couger MB, Ojha S, Pummill JF, Koon JA, II, Wideman RF, Jr., Rhoads DD. 2015.  
434 Genome analysis of *Staphylococcus agnetis*, an agent of lameness in broiler chickens. *PLoS One*  
435 10:e0143336.
- 436 3. Thøfner ICN, Poulsen LL, Bisgaard M, Christensen H, Olsen RH, Christensen JP. 2019.  
437 Longitudinal Study on Causes of Mortality in Danish Broiler Breeders. *Avian Dis* 63:400-410.
- 438 4. Jiang T, Mandal RK, Jr. RFW, Khatiwara A, Pevzner I, Kwon YM. 2015. Molecular survey of  
439 bacterial communities associated with bacterial chondronecrosis with osteomyelitis (BCO) in  
440 broilers. *PLoS One* 10:e0124403.
- 441 5. Al-Rubaye AAK, Ekesi NS, Zaki S, Emami NK, Wideman RF, Rhoads DD. 2017. Chondronecrosis  
442 with osteomyelitis in broilers: Further defining a bacterial challenge model using the wire  
443 flooring model. *Poult Sci* 96:332-340.
- 444 6. Anonymous. !!! INVALID CITATION !!! (2, 7).
- 445 7. Wideman RF, Prisby RD. 2013. Bone circulatory disturbances in the development of  
446 spontaneous bacterial chondronecrosis with osteomyelitis: A translational model for the  
447 pathogenesis of femoral head necrosis. *Front Endocrinol (Lausanne)* 3:183.
- 448 8. Andreasen JR, Andreasen CB, Anwer M, Sonn AE. 1993. Heterophil chemotaxis in chickens with  
449 natural Staphylococcal infections. *Avian Dis* 37:284-289.
- 450 9. Butterworth A. 1999. Infectious components of broiler lameness: a review. . *Worlds Poult Sci J*  
451 55:327-352.
- 452 10. McNamee P, McCullagh J, Thorp B, Ball H, Graham D, McCullough S, McConaghy D, Smyth J.  
453 1998. Study of leg weakness in two commercial broiler flocks. *Vet Rec* 143:131-135.



- 454 11. McNamee PT, Smyth JA. 2000. Bacterial chondronecrosis with osteomyelitis ('femoral head  
455 necrosis') of broiler chickens: a review. *Avian Pathol* 29:477-495.
- 456 12. Mutalib A, Riddell C, Osborne AD. 1983. Studies on the pathogenesis of Staphylococcal  
457 osteomyelitis in chickens. II. Role of the respiratory tract as a route of infection. *Avian Dis*  
458 27:157-160.
- 459 13. El-Lethey H, Huber-Eicher B, Jungi TW. 2003. Exploration of stress-induced immunosuppression  
460 in chickens reveals both stress-resistant and stress-susceptible antigen responses. *Vet Immunol*  
461 *Immunopathol* 95:91-101.
- 462 14. Shwani A, Adkins PRF, Ekesi NS, Alrubaye A, Calcutt MJ, Middleton JR, Rhoads DD. 2020. Whole  
463 genome comparisons of *Staphylococcus agnetis* isolates from cattle and chickens. *Appl Environ*  
464 *Microbiol* 86:e00484-20.
- 465 15. Kibenge FSB, Wilcox GE, Perret D. 1982. Staphylococcus aureus isolated from poultry in Australia  
466 I. Phage typing and cultural characteristics. *Vet Microbiol* 7:471-483.
- 467 16. Emslie KR, Nade S. 1983. Acute hematogenous Staphylococcal osteomyelitis: a description of the  
468 natural history in an avian model. *Am J Pathol* 110:333-345.
- 469 17. Hocking PM. 1992. Musculo-skeletal disease in heavy breeding birds., p 297-309. *In* Whitehead  
470 CC (ed), *Bone Biology and Skeletal Disorders in Poultry*. Carfax Publishing Company, Abingdon,  
471 United Kingdom.
- 472 18. Thorp BH, Whitehead CC, Dick L, Bradbury JM, Jones RC, Wood A. 1993. Proximal femoral  
473 degeneration in growing broiler fowl. *Avian Pathol* 22:325-342.
- 474 19. Thorp BH. 1994. Skeletal disorders in the fowl: a review. *Avian Pathol* 23:203-236.
- 475 20. Butterworth A, Reeves NA, Harbour D, Werrett G, Kestin SC. 2001. Molecular typing of strains of  
476 *Staphylococcus aureus* isolated from bone and joint lesions in lame broilers by random  
477 amplification of polymorphic DNA. *Poult Sci* 80:1339-1343.
- 478 21. Tarr PE, Sakoulas G, Ganesan A, Smith MA, Lucey DR. 2004. Hematogenous enterococcal  
479 vertebral osteomyelitis: report of 2 cases and review of the literature. *J Infect* 48:354-362.
- 480 22. Stalker MJ, Brash ML, Weisz A, Ouckama RM, Slavic D. 2010. Arthritis and osteomyelitis  
481 associated with *Enterococcus cecorum* infection in broiler and broiler breeder chickens in  
482 Ontario, Canada. *J Vet Diagn Invest* 22:643-645.
- 483 23. Lowder BV, Guinane CM, Ben Zakour NL, Weinert LA, Conway-Morris A, Cartwright RA, Simpson  
484 AJ, Rambaut A, Nübel U, Fitzgerald JR. 2009. Recent human-to-poultry host jump, adaptation,  
485 and pandemic spread of *Staphylococcus aureus*. *PNAS USA* 106:19545-19550.
- 486 24. Wijesurendra DS, Chamings AN, Bushell RN, Rourke DO, Stevenson M, Marendá MS,  
487 Noormohammadi AH, Stent A. 2017. Pathological and microbiological investigations into cases  
488 of bacterial chondronecrosis and osteomyelitis in broiler poultry. *Avian Pathol* 46:683-694.
- 489 25. Braga JFV, Chanteloup NK, Trottereau A, Baucheron S, Guabiraba R, Ecco R, Schouler C. 2016.  
490 Diversity of *Escherichia coli* strains involved in vertebral osteomyelitis and arthritis in broilers in  
491 Brazil. *BMC Vet Res* 12:140.
- 492 26. Alrubaye A, Ekesi NS, Hasan A, Koltes DA, Wideman Jr R, Rhoads D. 2020. Chondronecrosis with  
493 osteomyelitis in broilers: Further defining a bacterial challenge model using standard litter  
494 flooring and protection with probiotics. *Poult Sci* 99:6474-6480.
- 495 27. Alrubaye AAK, Ekesi NS, Hasan A, Elkins E, Ojha S, Zaki S, Dridi S, Wideman RF, Rebollo MA,  
496 Rhoads DD. 2020. Chondronecrosis with Osteomyelitis in Broilers: Further Defining Lameness-  
497 Inducing Models with Wire or Litter Flooring, to Evaluate Protection with Organic Trace  
498 Minerals. *Poult Sci* 99:5422-5429.
- 499 28. Tormo MÁ, Ferrer MD, Maiques E, Úbeda C, Selva L, Lasa Í, Calvete JJ, Novick RP, Penadés JR.  
500 2008. *Staphylococcus aureus* Pathogenicity Island DNA Is Packaged in Particles Composed of  
501 Phage Proteins. *J Bact* 190:2434.

- 502 29. Dearborn AD, Dokland T. 2012. Mobilization of pathogenicity islands by *Staphylococcus aureus*  
503 strain Newman bacteriophages. *Bacteriophage* 2:70-78.
- 504 30. Wideman RF, Al-Rubaye A, Gilley A, Reynolds D, Lester H, Yoho D, Hughes JM, Pevzner I. 2013.  
505 Susceptibility of 4 commercial broiler crosses to lameness attributable to bacterial  
506 chondronecrosis with osteomyelitis. *Poult Sci* 92:2311-2325.
- 507 31. Sambrook J, Fritsch EF, Maniatis T. 1989. *Molecular cloning: a laboratory manual*. Cold Spring  
508 Harbor Laboratory Press, Cold Spring Harbor, NY, USA.
- 509 32. Wick RR, Judd LM, Gorrie CL, Holt KE. 2017. Unicycler: Resolving bacterial genome assemblies  
510 from short and long sequencing reads. *PLoS Comput Biol* 13:e1005595.
- 511 33. Wick RR, Schultz MB, Zobel J, Holt KE. 2015. Bandage: interactive visualization of de novo  
512 genome assemblies. *Bioinformatics* 31:3350-3352.
- 513 34. Davis JJ, Wattam AR, Aziz RK, Brettin T, Butler R, Butler RM, Chlenski P, Conrad N, Dickerman A,  
514 Dietrich EM, Gabbard JL, Gerdes S, Guard A, Kenyon RW, Machi D, Mao C, Murphy-Olson D,  
515 Nguyen M, Nordberg EK, Olsen GJ, Olson RD, Overbeek JC, Overbeek R, Parrello B, Pusch GD,  
516 Shukla M, Thomas C, VanOeffelen M, Vonstein V, Warren AS, Xia F, Xie D, Yoo H, Stevens R.  
517 2020. The PATRIC Bioinformatics Resource Center: expanding data and analysis capabilities.  
518 *Nucleic Acids Res* 48:D606-d612.
- 519 35. Pritchard L, Glover RH, Humphris S, Elphinstone JG, Toth IK. 2016. Genomics and taxonomy in  
520 diagnostics for food security: soft-rotting enterobacterial plant pathogens. *Anal Methods* 8:12-  
521 24.
- 522 36. Lefort V, Desper R, Gascuel O. 2015. FastME 2.0: A Comprehensive, Accurate, and Fast Distance-  
523 Based Phylogeny Inference Program. *Mol Biol Evol* 32:2798-2800.
- 524 37. Han MV, Zmasek CM. 2009. phyloXML: XML for evolutionary biology and comparative genomics.  
525 *BMC Bioinformatics* 10:356.
- 526 38. Aziz RK, Bartels D, Best AA, DeJongh M, Disz T, Edwards RA, Formsma K, Gerdes S, Glass EM,  
527 Kubal M, Meyer F, Olsen GJ, Olson R, Osterman AL, Overbeek RA, McNeil LK, Paarmann D,  
528 Paczian T, Parrello B, Pusch GD, Reich C, Stevens R, Vassieva O, Vonstein V, Wilke A, Zagnitko O.  
529 2008. The RAST server: Rapid annotations using subsystems technology. *BMC Genomics* 9:75.
- 530 39. Overbeek R, Olson R, Pusch GD, Olsen GJ, Davis JJ, Disz T, Edwards RA, Gerdes S, Parrello B,  
531 Shukla M, Vonstein V, Wattam AR, Xia F, Stevens R. 2014. The SEED and the Rapid Annotation of  
532 microbial genomes using Subsystems Technology (RAST). *Nucleic Acids Res* 42:D206-14.
- 533 40. Madden T. 9/25/2020 2008. BLAST® Command Line Applications User Manual. 2008-. .  
534 <https://www.ncbi.nlm.nih.gov/books/NBK279691/>. Accessed

535

536 Table 1. Microbiological sampling of bone and blood samples from two commercial broiler  
 537 farms experiencing BCO outbreaks. BCO diagnoses are listed along with necropsy comments;  
 538 RF- right femur, LF- left femur, RT-right tibia, LT- the left tibia, T4- vertebral joint, N- normal,  
 539 THN- tibial head necrosis, THNS- THN severe, FHN- femoral head necrosis, KB- kinky back, TD-  
 540 tibial dyschondroplasia, FHS- femoral head separation. High Colony Counts lists the Species  
 541 diagnosis from 16S rRNA gene sequencing where a large number (>50) of same color colonies  
 542 were recovered from one or more Site(s) indicating high probability of infection.

| Bird   | Farm | BCO Diagnoses |      |     |     |    | High Colony Counts                  |             |  |
|--------|------|---------------|------|-----|-----|----|-------------------------------------|-------------|--|
|        |      | LT            | RT   | LF  | RF  | T4 | Species                             | Site        |  |
| KB1    | 1    | THN           | N    | FHN | FHN | KB | <i>E. cecorum</i>                   | T4          |  |
| KB2    | 1    | THN           | N    | N   | N   | N  | <i>E. cecorum</i>                   | T4          |  |
| Lame3  | 1    | THN           | THN  | FHN | FHN | KB | <i>E. coli</i><br><i>S. agnetis</i> | RT<br>T4    |  |
| Lame4  | 1    | THN           | THN  | FHN | FHN | KB | -                                   | -           |  |
| Lame5  | 1    | TD            | TD   | FHN | FHN |    | <i>E. cecorum</i>                   | LT RT       |  |
| Lame6  | 1    | THN           | THN  | FHN | FHN | KB | -                                   | -           |  |
| Lame7  | 2    | N             | THN  | FHN | N   | N  | <i>E. coli</i>                      | Blood       |  |
| Lame8  | 2    | THN           | THN  | FHS | FHN | N  | -                                   |             |  |
| Lame9  | 2    | THN           | THN  | FHN | N   | KB | <i>E. coli</i>                      | blood LT LF |  |
| Lame10 | 2    | THN           | THN  | N   | FHN | KB | <i>S. enterica</i>                  | LT RF       |  |
| Lame11 | 2    | THNS          | THNC | FHS | FHN | N  | <i>E. coli</i>                      | blood LT LF |  |
| Lame12 | 2    | THN           | THN  | FHT | FHT | N  | <i>E. coli</i>                      | blood LT LF |  |
| Lame13 | 2    | -             | -    | FHN | FHN | -  | -                                   | -           |  |
| Lame14 | 3    | THNS          | THNS | FHN | N   | -  | <i>S. aureus</i>                    | LT LF RT    |  |
| Lame15 | 3    | THN           | THNS | FHN | FHN | -  | <i>S. aureus</i>                    | LT LF RT RF |  |
| Lame16 | 3    | THNS          | THNS | FHS | FHN | -  | <i>S. aureus</i>                    | LT          |  |
| Lame17 | 3    | THNS          | THNS | N   | FHN | -  | <i>S. aureus</i>                    | LT RT RF    |  |
| Lame18 | 3    | THNS          | THNS | FHN | FHN | -  | <i>E. coli</i>                      | LT LF RT RF |  |
| Lame19 | 3    | THNS          | THNS | FHN | FHS | -  | <i>S. epidermidis</i>               | LT RF       |  |
| Lame20 | 3    | THNS          | THNS | N   | N   | -  | <i>S. cohnii</i>                    | LT RT       |  |
| Lame21 | 3    | THNS          | THNS | FHN | FHN | -  | <i>S. aureus</i>                    | LT LF RT RF |  |
| Lame22 | 3    | THNS          | THNS | FHN | FHS | -  | <i>S. simulans</i>                  | RF          |  |
| Lame23 | 3    | THNS          | THN  | FHN | FHN | -  | <i>S. aureus</i>                    | LT LF RT RF |  |
| Lame24 | 3    | THNS          | THN  | FHT | FHT | -  | <i>S. aureus</i>                    | LT LF RT RF |  |

543

544 Table 2. Bacterial genome assemblies produced in these analyses are listed by species, Isolate  
545 designation, host source, assembly genome Status and statistics (Mbp, Contig count), NCBI  
546 Biosample. Abbreviations are as in Table 1.

| Isolate                 | Source    | Status   | Mbp   | Contigs | Biosample    |
|-------------------------|-----------|----------|-------|---------|--------------|
| <b><i>E. coli</i></b>   |           |          |       |         |              |
| 1409                    | RT Lame3  | Finished | 5.063 | 4       | SAMN12285857 |
| 1413                    | Blood     | Finished | 5.375 | 59      | SAMN12285859 |
|                         | Lame12    |          |       |         |              |
| 1512                    | LF Lame18 | Draft    | 4.962 | 152     | SAMN13245724 |
| 1527                    | RF Lame18 | Draft    | 4.904 | 179     | SAMN13245725 |
| <b><i>S. aureus</i></b> |           |          |       |         |              |
| 1510                    | LT Lame14 | Draft    | 2.794 | 96      | SAMN13245722 |
| 1511                    | RT Lame14 | Draft    | 2.804 | 87      | SAMN15589960 |
| 1513                    | LF Lame15 | Draft    | 2.822 | 78      | SAMN15589961 |
| 1514                    | RF Lame15 | Draft    | 2.821 | 78      | SAMN15589962 |
| 1515                    | RF Lame16 | Draft    | 2.820 | 84      | SAMN15589963 |
| 1516                    | LT Lame16 | Draft    | 2.827 | 79      | SAMN13245723 |
| 1517                    | LT Lame17 | Draft    | 2.827 | 78      | SAMN15589964 |
| 1518                    | RF Lame17 | Draft    | 2.817 | 85      | SAMN15589965 |
| 1519                    | LT Lame21 | Draft    | 2.846 | 60      | SAMN15589966 |
| 1520                    | RF Lame21 | Draft    | 2.827 | 78      | SAMN15589967 |
| 1521                    | RF Lame23 | Draft    | 2.820 | 89      | SAMN15589968 |
| 1522                    | RT Lame23 | Draft    | 2.816 | 89      | SAMN15589969 |
| 1523                    | RF Lame24 | Draft    | 2.821 | 87      | SAMN15589970 |
| 1524                    | LT Lame24 | Draft    | 2.820 | 83      | SAMN15589971 |

547

Table 3. Percent identity from tBLASTn searches of *S. aureus* genomes using the polypeptide sequences for protein encoding genes from ED98. PEG originally identified as possibly chicken pathogen specific are indicated (\*). Annotations are derived from SEED augmented by BLASTp queries at NCBI. The 29 human isolates are from the clades surrounding the ED98 clade as described in the text and identified in Table S1. Avian isolates include 2 chicken commensals (ch3 and ch5); 10 chicken pathogens from the ED98 clade; a partridge (pa3), pheasant (ph3) and unknown host (X22) from the X22 clade; and chicken isolate ch24 (not in the ED98 or X22 clade). Count for NCBI *S. aureus* Desc is the number of descriptions returned (max 5000) with >80% identity for an NCBI tBLASTn search of *S. aureus* (Taxonomy ID: 1280), which roughly approximates the number of genome entries encoding a highly related polypeptide. Additional genome details are in the text and Table S1.

| Protein Encoding Gene |                                                       | tBLASTn percent identity for isolate genome(s) |          |            |     |           |      |      |      |      |        |        |        |        |      |          |     |     | Count for NCBI <i>S. aureus</i> Desc |  |      |
|-----------------------|-------------------------------------------------------|------------------------------------------------|----------|------------|-----|-----------|------|------|------|------|--------|--------|--------|--------|------|----------|-----|-----|--------------------------------------|--|------|
| PEG                   | Polypeptide Annotation                                | Length                                         | 29 human | Commensals |     | Pathogens |      |      |      |      |        |        |        |        |      | X22clade |     |     |                                      |  |      |
|                       |                                                       |                                                |          | ch3        | ch5 | ch9       | ED98 | ch21 | ch22 | ch23 | B2-15A | B3-17D | B4-59C | B8-13D | 1519 | pa3      | ph3 | X22 | ch24                                 |  |      |
|                       | 47 hypothetical                                       | 638                                            | 54       | 93         | 93  | 100       | 100  | 100  | 100  | 100  | 100    | 100    | 67     | 100    | 100  | 93       | 93  | 0   | 0                                    |  | 25   |
|                       | *48 hypothetical                                      | 56                                             | 0        | 0          | 0   | 100       | 100  | 100  | 100  | 100  | 100    | 100    | 95     | 100    | 100  | 0        | 0   | 0   | 0                                    |  | 28   |
|                       | 49 hypothetical                                       | 452                                            | 81       | 96         | 96  | 100       | 100  | 100  | 100  | 100  | 100    | 100    | 93     | 100    | 100  | 96       | 96  | 29  | 29                                   |  | 381  |
|                       | 754 Methionine ABC transporter substrate-binding      | 274                                            | 100      | 100        | 100 | 100       | 100  | 100  | 100  | 100  | 100    | 100    | 100    | 100    | 100  | 99       | 99  | 99  | 99                                   |  | 1012 |
|                       | *755 Integrase SaPI                                   | 407                                            | 99       | 45         | 45  | 100       | 100  | 100  | 100  | 100  | 100    | 100    | 100    | 100    | 100  | 99       | 99  | 100 | 45                                   |  | 307  |
|                       | *756 SAP domain (DNA binding domain)                  | 463                                            | 100      | 0          | 0   | 100       | 100  | 100  | 100  | 100  | 100    | 100    | 100    | 100    | 100  | 100      | 100 | 100 | 0                                    |  | 53   |
|                       | *757 hypothetical in SaPI                             | 191                                            | 100      | 0          | 0   | 100       | 100  | 100  | 100  | 100  | 100    | 100    | 100    | 100    | 100  | 98       | 98  | 100 | 30                                   |  | 53   |
|                       | *758 hypothetical in SaPI                             | 74                                             | 100      | 0          | 0   | 100       | 100  | 100  | 100  | 100  | 100    | 100    | 100    | 100    | 100  | 100      | 100 | 100 | 0                                    |  | 53   |
|                       | *759 winged helix-turn-helix domain-containing        | 91                                             | 100      | 0          | 0   | 100       | 100  | 100  | 100  | 100  | 100    | 100    | 100    | 100    | 100  | 100      | 100 | 100 | 41                                   |  | 394  |
|                       | *760 hypothetical in SaPI                             | 49                                             | 100      | 0          | 0   | 100       | 100  | 100  | 100  | 100  | 100    | 100    | 100    | 100    | 100  | 100      | 100 | 100 | 96                                   |  | 368  |
|                       | *761 hypothetical in SaPI                             | 71                                             | 41       | 0          | 0   | 45        | 100  | 100  | 100  | 100  | 100    | 100    | 100    | 100    | 100  | 42       | 42  | 100 | 0                                    |  | 89   |
|                       | *762 hypothetical in SaPI                             | 120                                            | 0        | 0          | 0   | 0         | 100  | 100  | 100  | 100  | 100    | 100    | 100    | 100    | 100  | 0        | 0   | 100 | 0                                    |  | 24   |
|                       | *763 DUF1474 family                                   | 106                                            | 84       | 0          | 0   | 49        | 100  | 100  | 100  | 100  | 100    | 100    | 100    | 100    | 100  | 63       | 63  | 100 | 60                                   |  | 84   |
|                       | *764 primase alpha helix C-terminal domain-containing | 290                                            | 83       | 0          | 0   | 94        | 100  | 100  | 100  | 100  | 100    | 100    | 100    | 100    | 100  | 97       | 97  | 100 | 26                                   |  | 200  |
|                       | *765 DNA helicase                                     | 570                                            | 21       | 0          | 0   | 99        | 100  | 100  | 100  | 100  | 100    | 100    | 100    | 100    | 100  | 99       | 99  | 100 | 22                                   |  | 200  |
|                       | *766 hypothetical in SaPI                             | 127                                            | 30       | 0          | 0   | 99        | 100  | 100  | 100  | 100  | 100    | 100    | 100    | 100    | 100  | 98       | 98  | 100 | 0                                    |  | 199  |
|                       | *767 hypothetical in SaPI                             | 214                                            | 97       | 0          | 0   | 100       | 100  | 100  | 100  | 100  | 100    | 100    | 100    | 100    | 99   | 95       | 95  | 100 | 92                                   |  | 405  |
|                       | *768 hypothetical in SaPI                             | 114                                            | 97       | 0          | 0   | 100       | 100  | 100  | 100  | 100  | 100    | 100    | 100    | 100    | 100  | 99       | 99  | 100 | 98                                   |  | 353  |
|                       | *769 hypothetical in SaPI                             | 193                                            | 98       | 0          | 0   | 100       | 100  | 100  | 100  | 100  | 100    | 100    | 100    | 100    | 100  | 97       | 97  | 100 | 0                                    |  | 312  |
|                       | *770 capsid morphogenesis B                           | 43                                             | 97       | 0          | 0   | 100       | 100  | 100  | 100  | 100  | 100    | 100    | 100    | 100    | 100  | 97       | 97  | 100 | 0                                    |  | 312  |

| Protein Encoding Gene |                                                | tBLASTn percent identity for isolate genome(s) |          |            |     |     |      |      |           |      |        |        |        |          |      |     |     |     |      | Count for NCBI <i>S. aureus</i> Desc |
|-----------------------|------------------------------------------------|------------------------------------------------|----------|------------|-----|-----|------|------|-----------|------|--------|--------|--------|----------|------|-----|-----|-----|------|--------------------------------------|
| PEG                   | Polypeptide Annotation                         | Length                                         | 29 human | Commensals |     |     |      |      | Pathogens |      |        |        |        | X22clade |      |     |     |     |      |                                      |
|                       |                                                |                                                |          | ch3        | ch5 | ch9 | ED98 | ch21 | ch22      | ch23 | B2-15A | B3-17D | B4-59C | B8-13D   | 1519 | pa3 | ph2 | X22 | ch24 |                                      |
| *771                  | spore coat                                     | 176                                            | 97       | 0          | 0   | 100 | 100  | 100  | 100       | 100  | 100    | 100    | 100    | 98       | 96   | 96  | 100 | 94  | 406  |                                      |
| *772                  | hypothetical in SaPI                           | 114                                            | 86       | 36         | 36  | 100 | 100  | 100  | 100       | 100  | 100    | 100    | 100    | 100      | 85   | 85  | 100 | 85  | 405  |                                      |
| *773                  | terminase SaPI                                 | 190                                            | 97       | 46         | 46  | 96  | 100  | 100  | 100       | 100  | 100    | 100    | 100    | 100      | 99   | 99  | 100 | 96  | 839  |                                      |
| *774                  | hypothetical                                   | 59                                             | 0        | 0          | 0   | 87  | 100  | 100  | 100       | 100  | 100    | 100    | 100    | 100      | 100  | 100 | 100 | 0   | 42   |                                      |
| *775                  | hypothetical                                   | 130                                            | 0        | 0          | 0   | 95  | 100  | 100  | 100       | 100  | 100    | 100    | 100    | 100      | 100  | 100 | 100 | 0   | 48   |                                      |
| *776                  | hypothetical                                   | 403                                            | 0        | 0          | 0   | 89  | 100  | 100  | 100       | 100  | 100    | 100    | 100    | 100      | 91   | 91  | 100 | 0   | 48   |                                      |
| *777                  | hypothetical                                   | 109                                            | 44       | 44         | 44  | 52  | 100  | 100  | 100       | 100  | 100    | 99     | 100    | 100      | 58   | 58  | 100 | 55  | 10   |                                      |
| *778                  | hypothetical                                   | 164                                            | 0        | 0          | 0   | 100 | 100  | 100  | 100       | 100  | 100    | 100    | 100    | 100      | 0    | 0   | 100 | 0   | 37   |                                      |
| 779                   | CsbD stress response                           | 65                                             | 100      | 100        | 100 | 100 | 100  | 100  | 100       | 100  | 100    | 100    | 100    | 100      | 100  | 100 | 100 | 100 | 1011 |                                      |
| 1641                  | hypothetical                                   | 121                                            | 45       | 60         | 60  | 64  | 100  | 100  | 96        | 64   | 64     | 84     | 84     | 64       | 84   | 60  | 60  | 38  | 7    |                                      |
| *1642                 | hypothetical                                   | 198                                            | 50       | 75         | 75  | 75  | 100  | 99   | 99        | 75   | 75     | 100    | 100    | 75       | 75   | 75  | 0   | 0   | 7    |                                      |
| *1643                 | Secretory antigen SsaA-like transposon-related | 343                                            | 61       | 79         | 79  | 79  | 100  | 100  | 99        | 79   | 79     | 99     | 99     | 79       | 79   | 79  | 46  | 46  | 7    |                                      |
| *1644                 | hypothetical                                   | 644                                            | 51       | 71         | 71  | 70  | 100  | 100  | 100       | 70   | 70     | 98     | 96     | 70       | 98   | 71  | 71  | 0   | 7    |                                      |
| 1645                  | hypothetical                                   | 78                                             | 0        | 72         | 82  | 0   | 100  | 100  | 100       | 0    | 0      | 70     | 70     | 0        | 70   | 72  | 72  | 0   | 3    |                                      |
| 1646                  | hypothetical                                   | 56                                             | 0        | 0          | 0   | 85  | 100  | 100  | 85        | 85   | 85     | 85     | 87     | 85       | 85   | 0   | 0   | 0   | 2    |                                      |
| 1647                  | hypothetical                                   | 454                                            | 81       | 95         | 95  | 94  | 100  | 100  | 99        | 94   | 94     | 100    | 100    | 94       | 100  | 95  | 95  | 27  | 27   |                                      |
| *1648                 | hypothetical                                   | 111                                            | 0        | 69         | 69  | 0   | 100  | 100  | 94        | 0    | 0      | 94     | 94     | 0        | 94   | 69  | 69  | 0   | 7    |                                      |
| *1649                 | hypothetical                                   | 77                                             | 0        | 0          | 0   | 0   | 100  | 100  | 99        | 0    | 0      | 96     | 96     | 0        | 96   | 0   | 0   | 0   | 4    |                                      |
| *1650                 | hypothetical                                   | 73                                             | 0        | 0          | 0   | 0   | 100  | 100  | 100       | 0    | 0      | 94     | 94     | 0        | 94   | 0   | 0   | 0   | 7    |                                      |
| 1651                  | hypothetical                                   | 832                                            | 85       | 91         | 91  | 90  | 100  | 90   | 100       | 90   | 90     | 100    | 97     | 90       | 100  | 91  | 91  | 0   | 387  |                                      |
| *1652                 | hypothetical transposon-related                | 130                                            | 62       | 78         | 78  | 78  | 100  | 100  | 100       | 78   | 78     | 98     | 93     | 78       | 98   | 78  | 78  | 0   | 7    |                                      |
| 1653                  | hypothetical                                   | 87                                             | 60       | 72         | 72  | 72  | 100  | 100  | 100       | 72   | 72     | 97     | 82     | 72       | 97   | 72  | 72  | 0   | 7    |                                      |
| 1654                  | hypothetical transposon-related                | 359                                            | 65       | 86         | 86  | 87  | 100  | 96   | 100       | 86   | 86     | 98     | 91     | 86       | 98   | 86  | 86  | 0   | 6    |                                      |
| 1655                  | hypothetical                                   | 359                                            | 67       | 92         | 92  | 91  | 100  | 100  | 100       | 91   | 91     | 99     | 96     | 91       | 99   | 92  | 91  | 0   | 26   |                                      |
| 1656                  | hypothetical                                   | 101                                            | 63       | 92         | 92  | 92  | 100  | 100  | 100       | 92   | 92     | 98     | 94     | 92       | 92   | 92  | 92  | 0   | 27   |                                      |
| 1657                  | hypothetical                                   | 112                                            | 55       | 87         | 87  | 87  | 100  | 100  | 100       | 87   | 87     | 100    | 95     | 87       | 100  | 87  | 87  | 0   | 27   |                                      |
| 1658                  | conserved hypothetical transposon-related      | 102                                            | 26       | 85         | 85  | 85  | 100  | 100  | 100       | 85   | 85     | 100    | 85     | 85       | 100  | 85  | 85  | 0   | 27   |                                      |
| *1659                 | hypothetical protein                           | 95                                             | 71       | 78         | 80  | 87  | 100  | 100  | 100       | 87   | 87     | 99     | 91     | 87       | 99   | 78  | 78  | 0   | 22   |                                      |
| 1660                  | Acetyl-coenzyme A carboxyl transferase alpha   | 315                                            | 100      | 100        | 100 | 100 | 100  | 100  | 100       | 100  | 100    | 100    | 100    | 100      | 100  | 100 | 99  | 100 | 1014 |                                      |

| Protein Encoding Gene |                                                 | tBLASTn percent identity for isolate genome(s) |          |            |     |      |           |      |      |        |        |        |        |          |     | Count for NCBI <i>S. aureus</i> Desc |     |      |
|-----------------------|-------------------------------------------------|------------------------------------------------|----------|------------|-----|------|-----------|------|------|--------|--------|--------|--------|----------|-----|--------------------------------------|-----|------|
| PEG                   | Protein Encoding Gene<br>Polypeptide Annotation | Length                                         | 29 human | Commensals |     |      | Pathogens |      |      |        |        |        |        | X22clade |     |                                      |     |      |
|                       |                                                 |                                                | ch3      | ch5        | ch9 | ED98 | ch21      | ch22 | ch23 | B2-15A | B3-17D | B4-59C | B8-13D | 1519     | pa3 | ph2                                  | X22 | ch24 |
|                       | chain                                           |                                                |          |            |     |      |           |      |      |        |        |        |        |          |     |                                      |     |      |

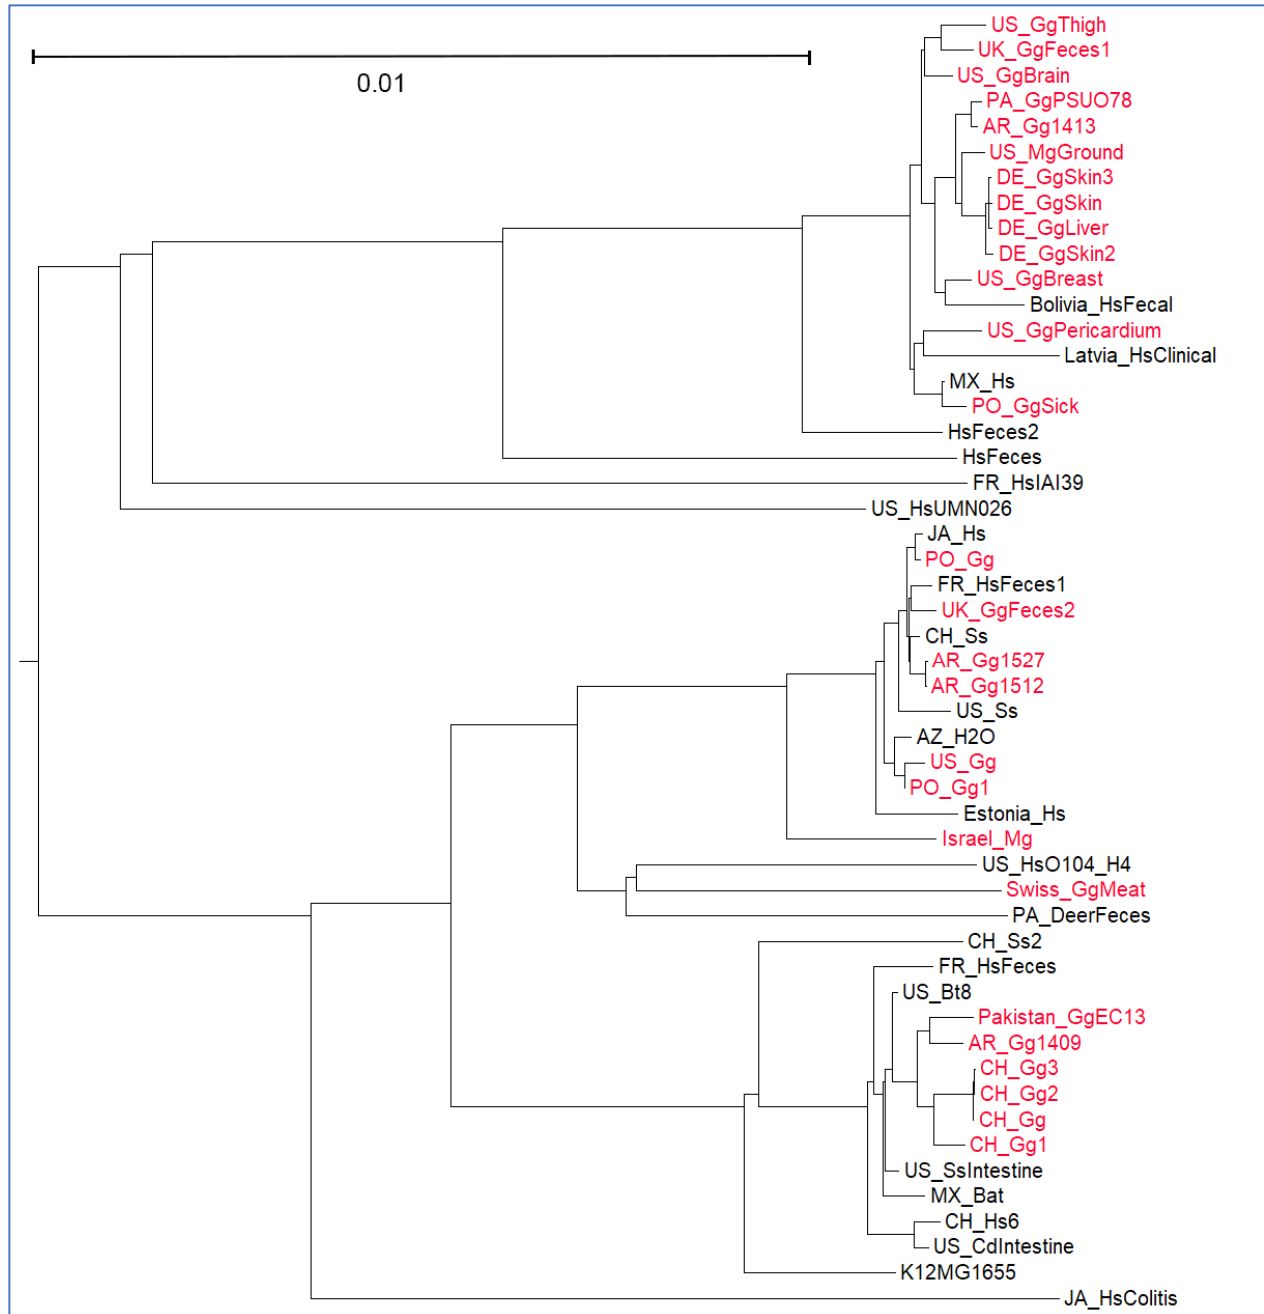

Figure 1. Phylogenetic tree for 51 *E. coli* genomes based on Average Nucleotide Identity. Key for isolate genomes is in Table S1. In brief, the prefix before the underline ( ) indicates geographic location, first two characters after the underline indicate host, and remaining characters indicate source, strain, or isolate. Isolates in red are from poultry or poultry products.



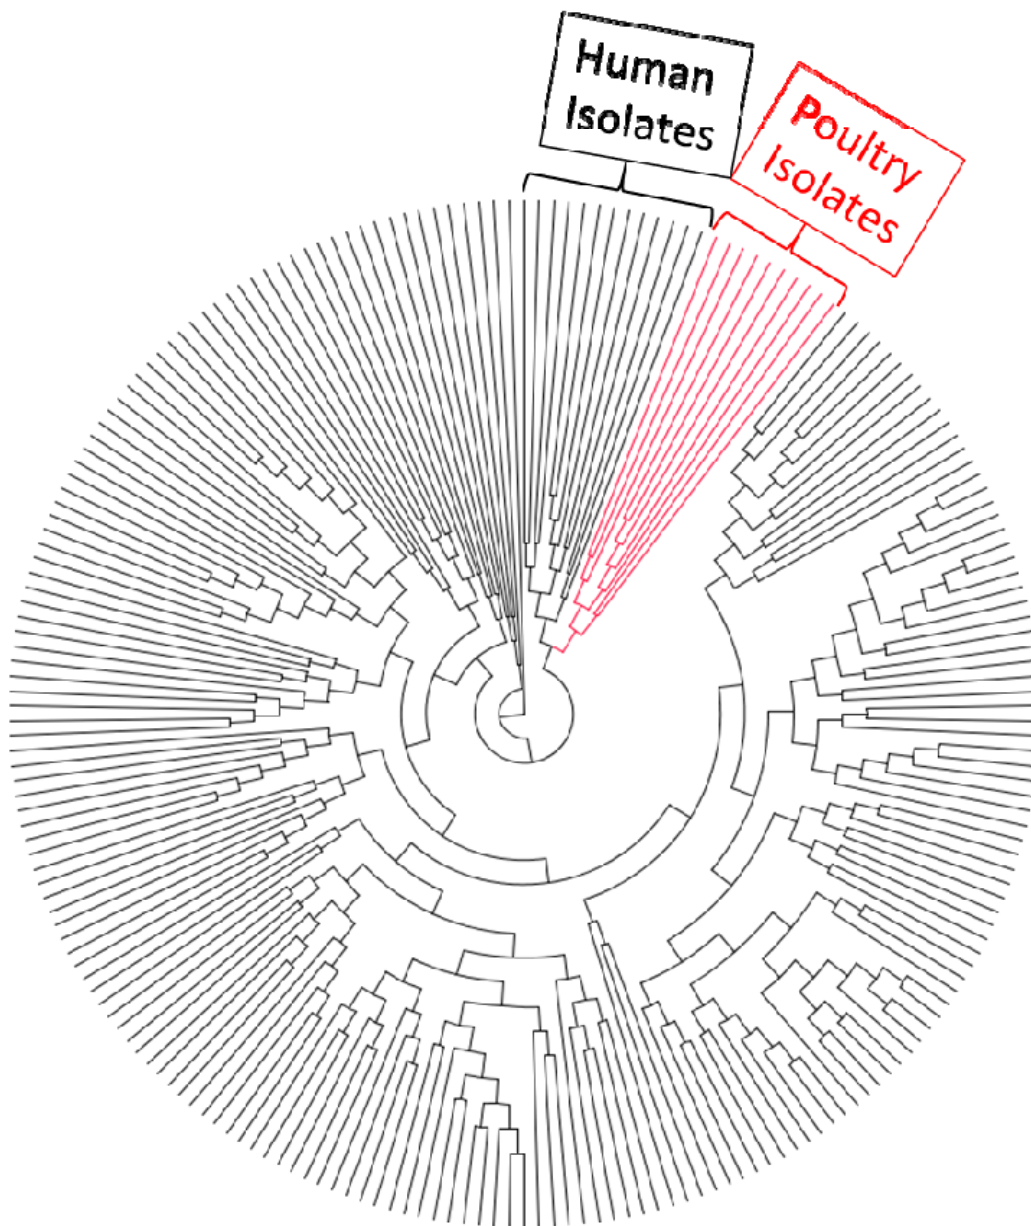

Figure 2. Phylogenetic subtree for 427 *S. aureus* genomes from NCBI based on whole genome BLAST comparisons. This subtree was an expanded view for the branch containing known poultry isolate genomes. The poultry isolate clade and a sister clade of human isolates are indicated.

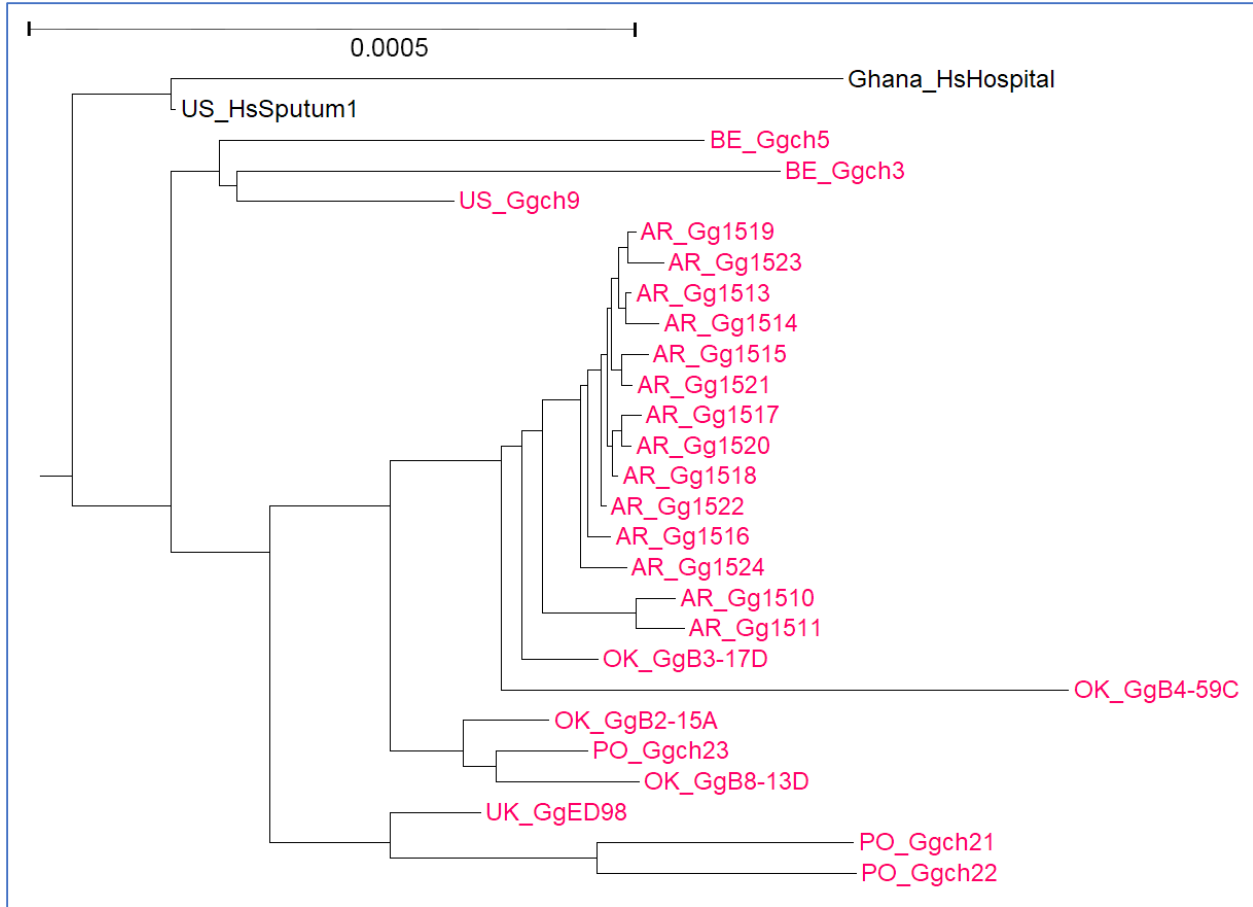

Figure 3. Phylogenetic tree for 27 *S. aureus* genomes based on Average Nucleotide Identity. Key for isolate genomes is in Table S1 and as described in legend to Figure 1. The tree compares 25 known isolates from poultry or poultry products (in red) with the closest related human isolates (in black).
